# Supplementary material
Source: MDPI journal article supplement (https://www.mdpi.com/2073-4395/14/4/858)
Supplement: s1 [file s1]

## Article

# Response of *Triticum Vulgare* Growth and Nitrogen Allocation to Irrigation Methods and Regimes under Subsoiling Tillage

Chao Huang <sup>1,2,3,4,†</sup>, Xuchen Liu <sup>1,2,3,4,†</sup>, Yang Gao <sup>1,2</sup>, Haiqing Chen <sup>1,2,3</sup>, Shoutian Ma <sup>1,2,3</sup>, Anzhen Qin <sup>1,2,3</sup>, Yingying Zhang <sup>1,3</sup>, Zile Gao <sup>5</sup>, Yan Song <sup>5</sup>, Jinkai Sun <sup>5</sup> and Zhandong Liu <sup>1,2,3,\*</sup>

<sup>1</sup> Institute of Farmland Irrigation, Chinese Academy of Agriculture Sciences, Xinxiang 453003, China; huangchao\_124@126.com (C.H.); finaloo@163.com (X.L.); gaoyang@caas.cn (Y.G.); chqboss@163.com (H.C.); mashoutian@caas.cn (S.M.); qinanzhen@caas.cn (A.Q.); hdzyy155@163.com (Y.Z.)

<sup>2</sup> Western Agricultural Research Center, Chinese Academy of Agricultural Sciences, Changji 831100, China

<sup>3</sup> Henan Agricultural Efficient Water Field Scientific Observation and Research Station, Xinxiang 453003, China

<sup>4</sup> Graduate School of Chinese Academy of Agricultural Sciences, Beijing 100081, China

<sup>5</sup> Henan Yudong Water Conservancy Security Center, Kaifeng 475000, China; gaozile99111@163.com (Z.G.); syzsy1984@163.com (Y.S.); sunjinkai1987@sohu.com (J.S.)

\* Correspondence: liuzhandong@caas.cn

† These authors contributed equally to this work.

**Table S1.** Main technical parameters of planter.

| Item                  |        | Seeding machine                              |
|-----------------------|--------|----------------------------------------------|
| Name of machine       |        | 2BXF-12 of planter, made by Nonghaha Company |
| Seeding rows          |        | 6                                            |
| Weight / kg           |        | 300                                          |
| Overall dimensions    | L / cm | 163                                          |
|                       | W / cm | 150                                          |
|                       | H / cm | 104                                          |
| Power/ kw             |        | ≥20                                          |
| Fuel consumption L/ha |        | 8                                            |
| Depth of seeding/ cm  |        | 3-6 cm (adjustable)                          |

**Table S2.** Main technical parameters of harvester.

| Item                                                    |        | Harvester                              |
|---------------------------------------------------------|--------|----------------------------------------|
| Name of machine                                         |        | 4LZ-10M6, made by Lovol Gushen Company |
| Engine Power / ps                                       |        | 190                                    |
| Cutting width / mm                                      |        | 3000/3250                              |
| Weight / kg                                             |        | 7200                                   |
| Feed rate /kg·s <sup>-1</sup>                           |        | 10                                     |
| Overall dimensions                                      | L / cm | 700                                    |
|                                                         | W / cm | 362.5                                  |
|                                                         | H / cm | 347                                    |
| Grain storage capacity / m <sup>3</sup>                 |        | 2.8                                    |
| Operation efficiency / hm <sup>2</sup> ·h <sup>-1</sup> |        | 0.6-1.3                                |
| Threshing and separating method                         |        | Longitudinal and cross flow            |
| Driving wheel track / mm                                |        | 1900                                   |
| Cleaning method                                         |        | Air-Screen type                        |

**Table S3.** Main technical parameters of subsoler.

| Item                                                    |        | Harvester                                        |
|---------------------------------------------------------|--------|--------------------------------------------------|
| Name of machine                                         |        | 1S-250, made by Shangdong Dahua Machiney Company |
| Overall dimensions                                      | L / cm | 200                                              |
|                                                         | W / cm | 260                                              |
|                                                         | H / cm | 152                                              |
| Number of rows                                          |        | 4                                                |
| Row spac /cm                                            |        | 62                                               |
| Matching power / kw                                     |        | 89-106.6                                         |
| Working width / cm                                      |        | 250                                              |
| Weight / kg                                             |        | 980                                              |
| Structure type of Subsoiler blades                      |        | Eccentric column curved blade                    |
| Working depth / cm                                      |        | 25-50                                            |
| Operation efficiency / hm <sup>2</sup> ·h <sup>-1</sup> |        | 1.8-2.3                                          |
